# Supplementary material
Source: PubMed Central journal article supplement (PMC10629677)
Supplement: develop-150-201873_review_history.pdf [file develop-150-201873_review_history.pdf]

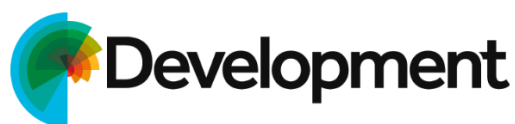

## scTOP: physics-inspired order parameters for cellular identification and visualization

Maria Yampolskaya, Michael Herriges, Laertis Ikonou, Darrell Kotton and Pankaj Mehta  
DOI: 10.1242/dev.201873

Editor: Paul Francois

### Review timeline

|                           |                   |
|---------------------------|-------------------|
| Original submission:      | 11 April 2023     |
| Editorial decision:       | 26 May 2023       |
| First revision received:  | 23 July 2023      |
| Editorial decision:       | 21 August 2023    |
| Second revision received: | 6 September 2023  |
| Accepted:                 | 11 September 2023 |

---

### Original submission

#### First decision letter

MS ID#: DEVELOP/2023/201873

MS TITLE: scTOP: physics-inspired order parameters for cellular identification and visualization

AUTHORS: Maria Yampolskaya, Michael Herriges, Laertis Ikonou, Darrell Kotton, and Pankaj Mehta

I have now received all the referees' reports on the above manuscript, and have reached a decision. The referees' comments are appended below, or you can access them online: please go to BenchPress and click on the 'Manuscripts with Decisions' queue in the Author Area.

As you will see, the referees express considerable interest in your work, but recommend some revision of your manuscript before we can consider publication. If you are able to revise the manuscript along the lines suggested, I will be happy to receive a revised version of the manuscript. Your revised paper will be re-reviewed by one or more of the original referees, and acceptance of your manuscript will depend on your addressing satisfactorily the reviewers' major concerns. Please also note that Development will normally permit only one round of major revision. If it would be helpful, you are welcome to contact us to discuss your revision in greater detail. Please send us a point-by-point response indicating your plans for addressing the referee's comments, and we will look over this and provide further guidance.

Please attend to all of the reviewers' comments and ensure that you clearly highlight all changes made in the revised manuscript. Please avoid using 'Tracked changes' in Word files as these are lost in PDF conversion. I should be grateful if you would also provide a point-by-point response detailing how you have dealt with the points raised by the reviewers in the 'Response to Reviewers' box. If you do not agree with any of their criticisms or suggestions please explain clearly why this is so.

Reviewer 1*Advance summary and potential significance to field*

This manuscript presents scTOP, a new method inspired by physics to infer and visualize a cell fate space. The method relies on classical methods/results from statistical mechanics of complex systems and allows for the definition of order parameters, which are interpreted as a score for a given cell fate. After introducing the method, the authors proceed with multiple validations and illustrations of the approach, which I found very convincing. The paper also is really well written.

As pointed out by the authors in the introduction, there are huge issues with very popular methods such as UMAP. scTOP offers an elegant alternative, where, once a reference ensemble has been built, simple scores can be computed using standard linear algebra, and furthermore dynamics in cell fate space can be visualized and interpreted. I think the very fact that it is even \*possible\* to do something as simple as this, while still being meaningful biologically, is of deep theoretical and practical importance, and justifies publication (although some of this was already discussed in a previous paper by the same group some time ago, but this is fine). I found the multiple examples illustrated varied enough and illuminating. The authors also discuss the limitations of the approach, which is good. I can imagine that scTOP could become one of the new important tools in the scRNA seq analysis arsenal, and I overall recommend publication.

*Comments for the author*

I have the following (mostly clarification) comments :

- the important fact that the method is linear is mentioned but its implication is not really discussed. Many people will think that linear method = PCA (for instance), and it should be mentioned that the linear computation used is different from unsupervised linear methods such as PCA and SVD ( because of the reference set). Also the method could prove useful way beyond single cell data because of this (for instance many people use PCA for morphometrics analysis, and I could see how having a reference dataset to perform computation would help there).
- I see what the authors mean when they say it is important that the algorithms should give deterministic results, but in some cases, well controlled stochastic results could be necessary/important. I was thinking of MCMC based models, or similarly, instead of computing a deterministic order parameter, one could imagine algorithms giving meaningful probability scores while not being fully deterministic. In the end, the choice of the reference base certainly adds a quenched disorder component. Maybe the authors can elaborate a bit on this deterministic/stochastic issue because I suspect some people might not necessarily see the deterministic aspect as a strength
- the ‘mathematical details’ part is very condensed. It is certainly very readable for a physicist, but I do not think developmental biologists (even the ones interested in ‘modelling’) will be able to understand statements like ‘decorrelated versions of the conventional spin-glass magnetization’. I would recommend a short crash course for biologists on what an order parameter is, since it is the crucial concept to define scores. I like equations but I am not even sure they should be in the main text, I could for instance imagine a version of the paper where those concepts are explained in an intuitive/graphical way. At the very least more ‘intuitive’ details should be given to biologists.
- in physics magnetization and spins could range from -1 to +1, here the order parameter is always positive (and lower than 1) as far as I can see. why ? In particular it is not entirely clear to me how things were put back between 0 and 1. Also, the maximum value of the order parameter computed from data seems to be around 0.5, can the authors comment on the magnitudes computed by their algorithm and how to interpret them ?
- when commenting on  $S^{\perp}$ , it is qualified as ‘biological noise’, but then reference to cell cycle genes, etc... is made. I can imagine genes related to, say, oscillating genes in the segmentation clocks, which would definitely be thrown away by the method (because they do not correspond to actual cell fates) but are definitely not developmental noise either. Maybe some comment should be added on situations like this, where gene dynamics not clearly associated with ‘fates’ (as defined by humans in their reference dataset) can not really be detected/visualized with this method. Along the same lines, it could be useful to show what happens with ‘virtual’ experiments where some reference fates are removed to contrast them with the situation with all fates

- The authors only show '2D' representation, for two order parameters. Is this because they only see binary choices in the data? Could we see in 3D a sequence of two binary choices for instance ? Is there anything biological to tell there?
- Table 1 : it is a bit unclear to me how the method was validated when Query data are used on the same reference set. I was expecting something classic like an initial separation between training/validating ensembles, etc... But it rather seems from the Supplement that the training set essentially was based on 'well-chosen' cells or something like this. It could be useful to give more details in the main text.
- along the same line, all results depend on the quality of the reference set. Is there a way to somehow benchmark it ? For instance, I could imagine that a bad reference set could give a lot of false negatives or false positives, how would we see this ? (maybe by comparing with some unsupervised method ?)
- The paper reads a bit long to me (12 figures, please check ). Maybe some figures with very similar messages/methods could be combined (e.g. 4,5,6) and the writing could be a bit tightened there as well. There is a lot of 'empty space' in some figures (eg 9, 12) which could be tightened
- 1st sentence : « humans and other mammals... » I guess other animals too

## Reviewer 2

### *Advance summary and potential significance to field*

The work of Yampolskaya et al. aims to construct a "parameter-free" representation of scRNA seq data that places cells along cell-type axes, which enables cell-type classification of single cells and a continuous measure of cell type for developing cells. The method "scTOP" constructs a reference basis for each cell type by taking the average expression of cells of the respective type in a reference dataset, and projects cells from a sample dataset along these axes using a statistical physics-inspired approach.

The strength of the approach is that its parameter-free, although they do have to define a threshold on the scTOP score to assign cell types, which I was not sure if there is a meaningful of assigning. But on the flipside, it requires input of cell types that are often defined by using multi-parameter "models" for clustering.

To me the potential significance of this work is in defining cell fate lineages based on cell types. And if it can be shown that indeed it can recover known - even some aspects of - gene-expression dynamics of known transitions that would be hugely impactful.

### *Comments for the author*

Overall, the manuscript clearly shows what scTOP can do and explain the method well, but I would like authors to address some issues before being considered for publication.

1. What is the relationship of scTOP to PCA? Presumably one could do PCA with C principal components for C distinct cell types and construct a new coordinate system as the average vector to each celltype. How should one think about this wrt to scTOP's basis vectors? Can you perhaps provide a comparison of how the two methods fair when thinking about cell types or intermediates and even lineages?
2. The authors say scTOP does not require data harmonization and is able to distinguish between technical and biological noise, but couldn't batch effects between the reference dataset and the sample dataset effect the results? Can you use some dataset to illustrate this, there are few discussed in the several batch correction papers?
3. Authors mention that pre-processing to generate z-scores is essential. It is not clear why that should be, at least authors don't explain it. For example, does a simpler, more intuitive normalization per cell of converting counts to fractions, work? I think there are many schemes of normalizations that have been proposed and having a clear analysis and discussion around that is essential for "users" who may be interested in using scTOP.
4. About lineages, this is perhaps the most important application of scTOP as it brings out something beyond cell types that was the input to the system. The authors have some discussion of

how having fewer cell types make it harder to map out the space and hence the lineages. But many applications where one is interested in cell fate dynamics of only a handful of cell types, sometimes one cell type going to two, is central to understand the underlying genetic logic of that drives the cascade of “bifurcations”. This feels like a big limitation, and I am curious if authors to say a little more on this, perhaps again by taking a concrete example, either with synthetic or real data.

5. Also, on lineages, could some analysis be provided to see if expected gene expression changes happen along the directions of cell fate changes? This would provide some confidence on the predicted cell fate dynamics.

Some minor points:

1. You should explicitly mention “xi” is the basis in methods section II A. I don’t think its explicitly mentioned anywhere and would be useful for readers not familiar with these types of methods.
2. Figure 2 a,b,c are referred to in the text but the figure does not contain these labels.
3. What is the interpretation of a negative scTOP score? Some of the plots contain small negative values. For example, in Figure 2 when plotting Ciliated vs AT2, cells high along the Ciliated axis become increasingly negative along the AT2 axis. Are these cells more or less like AT2 cells than the zero point? A similar result is seen in Figure 7 where high AT1 axis cells become increasing negative along the AT2 axis. Some other moderately high negative values are also seen in Figure 4 and 6.
4. Are there any dataset-specific preprocessing steps done? For example filtering cells or genes based on quality control metrics. If so, they should be reported so that the results are reproducible.
5. The code in the linked Github repository contains a tutorial, but the code used to run scTOP on the other datasets should also be provided.

## First revision

### Author response to reviewers' comments

#### Authors' Response to Reviewer 1

We would like to thank Reviewer 1 for their generally positive assessment as well as their insightful comments, suggestions, and questions. Please find below our detailed response.

#### Comment 1

the important fact that the method is linear is mentioned but its implication is not really discussed. Many people will think that linear method = PCA (for instance), and it should be mentioned that the linear computation used is different from unsupervised linear methods such as PCA and SVD (because of the reference set). Also the method could prove useful way beyond single cell data because of this (for instance many people use PCA for morphometrics analysis, and I could see how having a reference dataset to perform computation would help there).

Response:

We agree that this method is general enough to be applied to other contexts. We have added the following section to the Supplementary Information to explain how scTOP relates to other linear methods:

#### Comparison to other linear methods

scTOP is mathematically and conceptually distinct from other linear methods such as Principal Component Analysis (PCA). PCA takes input data and finds the vectors in feature space along which the most sample-to-sample variation occurs. PCA is unsupervised and assumes nothing is known about the input data. The principal components need to be examined to determine their biological relevance. The major difference with scTOP is that scTOP takes input data and a reference basis of known cell types. The input data is decomposed onto the vectors defined by the reference basis instead of vectors corresponding to the most sample-to-sample variation. With scTOP, the resulting decomposition has a direct interpretation: alignment with each of the known cell types within the

reference basis. It's not possible to find the decomposition onto known cell types with PCA, because PCA doesn't have the extra information about pre-defined cell type expression profiles. To summarize, scTOP and PCA both transform the sample data to a different coordinate system, but there are major differences between the spaces that these methods project onto. The following table breaks down the differences between these spaces.

| scTOP space                                                                | PCA space                                                                                                          |
|----------------------------------------------------------------------------|--------------------------------------------------------------------------------------------------------------------|
| Defined by an input reference basis of known cell types                    | Calculated by PCA by finding the orthogonal vectors (principal components) that best explain the variation in data |
| Can be non-orthogonal (e.g. can have highly-correlated cell types)         | Orthogonal by definition                                                                                           |
| Dimensions have clear biological interpretation: alignment with cell Types | Dimensions need to be closely analyzed to be interpreted                                                           |

#### Comment 2

I see what the authors mean when they say it is important that the algorithms should give deterministic results, but in some cases, well controlled stochastic results could be necessary/important. I was thinking of MCMC based models, or similarly, instead of computing a deterministic order parameter, one could imagine algorithms giving meaningful probability scores while not being fully deterministic. In the end, the choice of the reference base certainly adds a quenched disorder component. Maybe the authors can elaborate a bit on this deterministic/stochastic issue because I suspect some people might not necessarily see the deterministic aspect as a strength

#### Response:

We agree that stochastic results can be valuable. Rather than focus on the deterministic aspect of scTOP, we have edited the text to emphasize the importance of reproducibility rather than determinism. As you say, stochastic likelihood scores can also be useful; the important thing is the ability to make comparisons across analyses and data sets. We have changed the manuscript's mentions of determinism and stochasticity. For example, instead of "Second, the algorithm should be deterministic, further enhancing reproducibility," the text now states: "Second, the results of the algorithm should be reproducible, so that direct comparison between data sets is possible."

#### Comment 3

the 'mathematical details' part is very condensed. It is certainly very readable for a physicist, but I do not think developmental biologists (even the ones interested in 'modelling') will be able to understand statements like 'decorrelated versions of the conventional spin-glass magnetization'. I would recommend a short crash course for biologists on what an order parameter is, since it is the crucial concept to define scores. I like equations but I am not even sure they should be in the main text, I could for instance imagine a version of the paper where those concepts are explained in an intuitive/graphical way. At the very least more 'intuitive' details should be given to biologists.

#### Response:

As per the formatting guidelines for Development, we have moved the mathematical details to the "Materials and Methods" section after "Discussion." We have also expanded the introduction section to give a more detailed explanation of what an order parameter is (the additions are in blue).

Here, we present a new physics-inspired algorithm, single-cell Type Order Parameters (scTOP), that has all of these desired properties. The algorithm is based on the statistical physics concept of an order parameter - a coarse-grained quantity that can distinguish between phases of matter. An order parameter takes on different values depending on the phase of the system. Typically, in a disordered phase, the corresponding order parameter is zero, and in an ordered phase it is nonzero. Arguably the most famous example of an order parameter is magnetization in a ferromagnetic system, which is a collection of spins (in the simplest case, spins can be “up” or “down”) which align with one another. In a ferromagnet, the magnetization measures the alignment of spins and can be used to distinguish magnetic and paramagnetic phases. Below a particular temperature (known as the “critical temperature”), the spins in the ferromagnet align with one another. In a simple model, the order parameter (magnetization, which measures the average spin) is approximately one if all the spins are up and approximately negative one if all the spins are down. When the temperature exceeds the critical temperature, the system changes from the magnetic phase to the paramagnetic phase, and the spins do not align; instead, they are randomly up or down, and the order parameter is approximately zero.

It is straightforward to generalize the idea of magnetization to more complex settings such as spin glasses and attractor neural networks. In the context of attractor-network epigenetic landscape models of cell identity, this takes the form of generalized magnetizations that measure how aligned a gene expression state is with each of the attractor basins for different cell fates. Whereas magnetization for the ferromagnetic system measured whether the system was in a magnetic or paramagnetic phase, these generalized magnetizations measure which phase a gene regulatory network is in (where the different phases correspond to different cell types). These generalized magnetizations serve as natural order parameters for cellular identity and can be calculated directly from data. The scTOP algorithm builds on previous work by developing methods for integrating scRNA-seq data, greatly expanding the power and utility of this approach.

#### Comment 4

in physics magnetization and spins could range from -1 to +1, here the order parameter is always positive (and lower than 1) as far as I can see. why? In particular it is not entirely clear to me how things were put back between 0 and 1. Also, the maximum value of the order parameter computed from data seems to be around 0.5, can the authors comment on the magnitudes computed by their algorithm and how to interpret them?

Response:

scRNA-seq data is very sparse, so it's not possible to reach perfect alignment (score of +1). The reference basis contains aggregate profiles, where expressions have been averaged across cells of the same type. This removes many of the zeroes, but the single-cell samples still have many zeroes, resulting in misalignment. When samples are averaged in order to find aggregate scores, it's possible to reach higher scores thanks to the reduction in zeroes. The figure with the aggregate samples from the Mouse Cell Atlas compared to organs from Tabula Muris illustrates these higher scores. It also shows a few scores that are negative.

We have also added the following section to the Supplementary Information:

#### Interpreting scTOP scores

In theory, the attractor-network order parameters we have adapted for gene expression data range between negative one and positive one. An attractor state order parameter with a value of positive one means the system is perfectly aligned with that particular attractor state, and negative one means it is the exact opposite of that attractor state. Zero means that it is neither correlated nor anti-correlated with that attractor state.

In practice, scTOP scores generally do not reach positive one. scRNA-seq data contains significant numbers of dropouts, and these zeroes decrease the magnitude of the scTOP score. When an aggregate score is taken, the effect of dropouts is decreased and the scTOP score increases. This is important to keep in mind when interpreting scTOP scores; any score above 0.1 is notable, and since the data is so noisy even the best-case score may be well below 1. It's helpful to have a control population to compare with, to have a measure of the range of best-case scTOP scores. This is also why it's best to compare distributions of scores rather than scores for individual cells, since

noise plays a non-negligible role. scTOP scores are rarely negative. Negative values for scTOP scores correspond to cases where the sample gene expression profile is the opposite of the reference profile. For example, a score of -1 would indicate that all the genes which are highly-expressed in the reference are lowly-expressed in the sample, and vice versa. There are cases where the scores are low, negative values, indicating that the sample does not align well with the reference and that some genes which are highly- (lowly-) expressed in the reference are lowly- (highly-) expressed in the sample. From the data, it appears that it's unlikely for gene networks to contain cell types which are opposites of one another. One possible reason is that some genes, like housekeeping genes, are similarly expressed across all cell types. Also, it's possible that cells which expressed the exact opposite genes of any given cell type would not be able to survive.

#### Comment 5

when commenting on  $S^\perp$ , it is qualified as 'biological noise', but then reference to cell cycle genes, etc. . . is made. I can imagine genes related to, say, oscillating genes in the segmentation clocks, which would definitely be thrown away by the method (because they do not correspond to actual cell fates) but are definitely not developmental noise either. Maybe some comment should be added on situations like this, where gene dynamics not clearly associated with 'fates' (as defined by humans in their reference dataset) can not really be detected/visualized with this method. Along the same lines, it could be useful to show what happens with 'virtual' experiments where some reference fates are removed to contrast them with the situation with all fates

#### Response:

We agree that one of the limitations of scTOP is that it gives only information on cell differentiation.

It cannot capture the dynamics of gene expression beyond the changing of alignment with cell identities defined by the reference basis. To clarify this point, we have edited the  $S^\perp$  paragraph: Biologically,  $S^\perp$  contains information about processes that affect gene expression but are not associated with cell identity, such as the cell cycle. We refer to the  $\mu_j$  as the scTOP scores. Each component of this vector measures the projection of the cell with gene expression profile  $S_i$  onto the  $\mu_j$  - the cell type in the reference basis. These scores can be used to accurately classify cell identity and provide a natural visualization of gene expression in the space of possible cell fates. Gene regulatory dynamics that are unrelated to transitions between cell types in the reference basis would not be captured by these scores; instead, these would contribute to  $S^\perp$ . As a result, these fate-unrelated dynamics cannot be visualized using scTOP.

#### Comment 6

The authors only show '2D' representation, for two order parameters. Is this because they only see binary choices in the data? Could we see in 3D a sequence of two binary choices for instance? Is there anything biological to tell there?

#### Response:

It can be difficult to distinguish the positions of points in a 3D scatter plot. We have included figure 1 here to illustrate this. In this figure, we plot a clonal family from the hematopoietic data set in the main text. This is a case where multiple cell identities are of interest, but it is difficult to discern their relationships from a 3D plot. In cases where multiple fates are of interest, in binary choices or otherwise, we use pair-plots to show multiple 2D projections simultaneously.

#### Comment 7

Table I: it is a bit unclear to me how the method was validated when Query data are used on the same reference set. I was expecting something classic like an initial separation between training/validating ensembles, etc. . . But it rather seems from the Supplement that the training set essentially was based on 'well-chosen' cells or something like this. It could be useful to give more details in the main text.

Response:

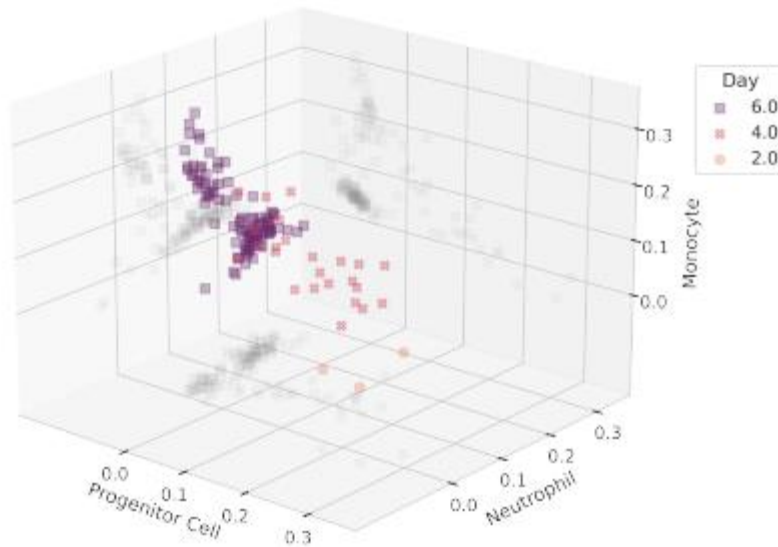

Figure 1: An example of a three-dimensional representation of scTOP scores, in the case of hematopoietic differentiation. Even with the inclusion of "shadows" (the corresponding 2D projections on the boundaries) it is difficult to determine the relationships between cells, which is why we use pair-plots in the main text instead.

We do have the initial separation between training and test data. For clarity, we have changed the table column names to "Test data source" and "Reference data source," and we have added the following line to the main text:

For cases where the training (or "reference") data source is the same as the test data source, we set aside a randomly-selected subset of cells for the training set and do not use them in the test data.

The discussion of curating data sets in the SI refers to the cell types, rather than the cells, that were chosen for the reference basis. In other words, we discard cell types that have fewer than 100 corresponding cells. We do this because scRNA-seq data has a lot of dropouts, so we need to average across many cells to get a reasonable reference basis. We want to make sure the reference gene expression profiles are reflective of the true gene expression profiles of the cell types; making sure there are enough training data points per cell type is what we mean by having "well-sampled" reference profiles.

To demonstrate the effect of not having enough cells per cell type, we have included figure 2. In this figure, we vary the number of cells sampled for the reference cell type profile, and find the corresponding scTOP score for the query data. With very few cells, the score is low since the reference type is poorly sampled. As the number of cells increase, the score plateaus. Ideally, we would have thousands of cells for every cell type, but unfortunately many single-cell data sets do not have so many cells per cell type.



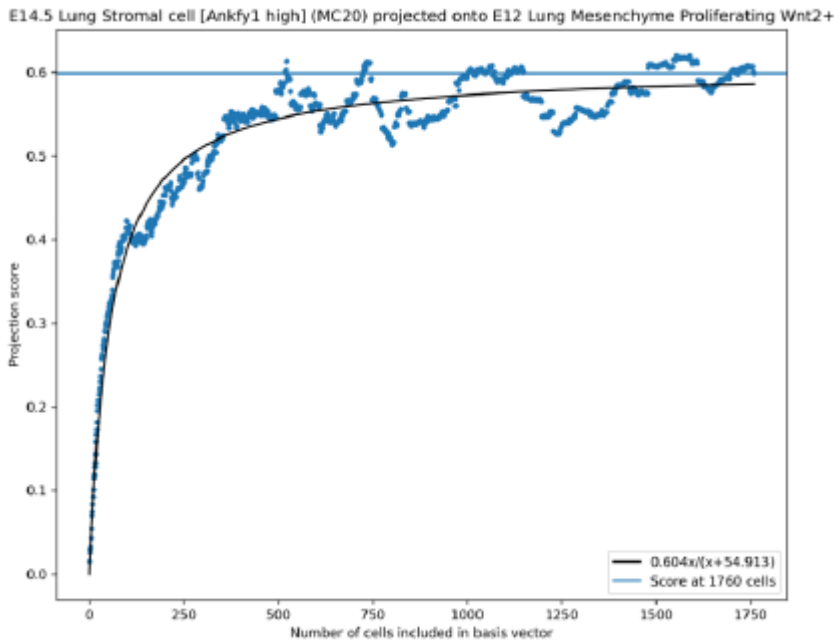

Figure 2: A plot of adult mouse lung stromal cells from the Mouse Cell Atlas projected onto a reference profile calculated from mesenchymal cells from the Atlas of Lung Development negretti2021single. The x-axis indicates the number of cells sampled for the reference cell type, and the y-axis indicates the scTOP score.

#### Comment 8

along the same line, all results depend on the quality of the reference set. Is there a way to somehow benchmark it? For instance, I could imagine that a bad reference set could give a lot of false negatives or false positives, how would we see this? (maybe by comparing with some unsupervised method?)

#### Response:

In order to benchmark the quality of the reference bases, we measured the accuracy scores of control samples scored with those bases. In the manuscript, we provide examples of comparing the accuracy metrics with unsupervised methods from Abdelaal et al. In particular we compare the F1 score for scTOP using the CellBench and Allen Mouse Brain atlas with the F1 scores achieved for the same data sets using a variety of automatic cell identification algorithms, including unsupervised methods. The F1 score is a metric that is calculated from the true positives, false positives, and false negatives.

Similar algorithms are often black boxes that are difficult to troubleshoot, but since scTOP simply uses linear algebra, it is possible to determine which genes are contributing to the scTOP scores. If a reference basis is giving a dubious result, it's possible to check if the top-contributing genes correspond to relevant biological processes. If not, this indicates that the reference basis may be poorly constructed, whether due to not having enough cells per cell type or not having distinct enough cell types.

#### Comment 9

The paper reads a bit long to me (12 figures, please check). Maybe some figures with very similar messages/methods could be combined (e.g. 4,5,6) and the writing could be a bit tightened there as well. There is a lot of 'empty space' in some figures (eg 9, 12) which could be tightened

#### Response:

In addition to ensuring that all figures match the formatting guidelines, we have made the following changes:

1. We have adjusted the layout and removed whitespace from figures 1, 5, and 6

2. We have removed redundant panels (or moved them to the Supplementary Information), as in figures 5 and 9
3. We have moved figure 8 to the Supplementary Information
4. We have combined three figures into the panels of figure 4, and tightened the writing accordingly

Comment 10

1st sentence : " humans and other mammals. . . " I guess other animals too

Response:

We have fixed this line to say "humans and other animals."

## Authors' Response to Reviewer 2

We would like to thank reviewer 2 for thoroughly reading the manuscript and their suggestions for improving the manuscript. Please find below our detailed responses.

Comment 1

What is the relationship of scTOP to PCA? Presumably one could do PCA with  $C$  principal components for  $C$  distinct cell types and construct a new coordinate system as the average vector to each celltype. How should one think about this wrt to scTOP's basis vectors? Can you perhaps provide a comparison of how the two methods fair when thinking about cell types or intermediates and even lineages

Response:

Although scTOP and PCA are both linear methods, there are significant differences between them. The principal components computed by PCA are the orthogonal dimensions that describe the most variance in the data. For example, the first principal component is the dimension along which the data varies the most. Taking  $C$  principal components would not provide information about alignment to the  $C$  cell types; instead, this coordinate system would give information about the top  $C$  dimensions along which there is the most variance. For example, if the input data corresponded to cells that were all of cell type A, the principal components would give information about how the gene expression varies between these cells, regardless of cell type. On the other hand, scTOP would identify all these cells as cell type A.

We have added the following section to the Supplementary Information to explain how scTOP relates to other linear methods:

### Comparison to other linear methods

scTOP is mathematically and conceptually distinct from other linear methods such as Principal Component Analysis (PCA). PCA takes input data and finds the vectors in feature space along which the most sample-to-sample variation occurs. PCA is unsupervised and assumes nothing is known about the input data. The principal components need to be examined to determine their biological relevance. The major difference with scTOP is that scTOP takes input data and a reference basis of known cell types. The input data is decomposed onto the vectors defined by the reference basis instead of vectors corresponding to the most sample-to-sample variation. With scTOP, the resulting decomposition has a direct interpretation: alignment with each of the known cell types within the reference basis. It's not possible to find the decomposition onto known cell types with PCA, because PCA doesn't have the extra information about pre-defined cell type expression profiles. To summarize, scTOP and PCA both transform the sample data to a different coordinate system, but there are major differences between the spaces that these methods project onto. The following table breaks down the differences between these spaces.

| scTOP space                                                                | PCA space                                                                                                          |
|----------------------------------------------------------------------------|--------------------------------------------------------------------------------------------------------------------|
| Defined by an input reference basis of known cell types                    | Calculated by PCA by finding the orthogonal vectors (principal components) that best explain the variation in data |
| Can be non-orthogonal (e.g. can have highly-correlated cell types)         | Orthogonal by definition                                                                                           |
| Dimensions have clear biological interpretation: alignment with cell types | Dimensions need to be closely analyzed to be interpreted                                                           |

#### Comment 2

The authors say scTOP does not require data harmonization and is able to distinguish between technical and biological noise, but couldn't batch effects between the reference dataset and the sample dataset effect the results? Can you use some dataset to illustrate this, there are few discussed in the several batch correction papers?

#### Response:

scTOP is able to identify cell types and give similar score distributions even across data sets. To demonstrate this, we analyzed dataset 4 from Tran et al. tran2020benchmark. This data set contains pancreatic data from 5 different sources. We have added the following section to the Supplementary Information:

#### Batch effects

scRNA-seq data produced using different sequencing platforms from different experiments may introduce variation in the form of batch effects. Because the pre-processing step in scTOP prioritizes the relative rather than absolute expression of genes, batch effects are mitigated.

Tran et al. tran2020benchmark consolidated datasets from different experiments for the purposes of benchmarking various batch-effect correction methods. One of these is a dataset containing scRNA-seq human pancreatic data from five different sources **baron2016single muraro2016single segerstolpe2016single wang2016single xin2016rna**, using various sequencing technologies. We used scTOP to analyze these datasets. Figure 3 illustrates that scTOP is not significantly affected by differences between batches. Because the Baron et al. dataset had the most cells per cell type, we used it to create a reference basis consisting of alpha, beta, ductal, acinar, delta, gamma, stellate, and endothelial gene expression profiles. We projected cells from the other four experiments onto the Baron reference basis. The top row shows kernel density estimate (KDE) plots for cells that match the reference cell type (e.g. alpha scores for alpha cells) with solid lines, and cells that do not match the reference type but have higher scores than the other non-matching types (e.g. alpha scores for beta cells) with dashed lines. The bottom row shows box-and-whisker plots for the cells that match the reference type.

Despite coming from different sources, the distributions of scores are similar. There is also a clear bimodal distribution for cells that match the reference type and cells that don't. This bimodality is a clear indication that batch effects don't cause misidentification. According to Ziegenhain et al. **ziegenhain2017comparative**, Smart-seq2 detects the most genes per cell when compared to other sequencing methods of that time. This decrease in dropouts may explain why the Segerstolpe data (which is the only experiment that used Smart-seq2) has slightly higher projections than the other datasets.

## Comment 3

Authors mention that pre-processing to generate z-scores is essential. It is not clear why that should be, at least authors don't explain it. For example, does a simpler, more intuitive normalization per cell of converting counts to fractions, work? I think there are many schemes of normalizations that have been proposed and having a clear analysis and discussion around that is essential for "users" who may be interested in using scTOP.

## Response:

To address this comment, we have added the following subsection under the "Preprocessing" section of the Supplementary Information.

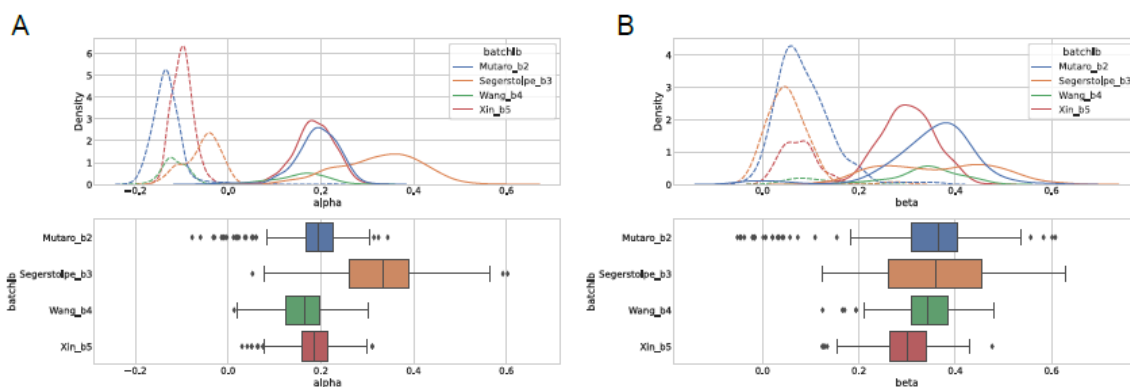

Figure 3: Pancreatic data from different experiments using different scRNA-seq technologies. The reference basis uses data from Baron et al. baron2016single, and the cells that are projected onto this basis are from Muraro et al. muraro2016single, Segerstolpe et al. segerstolpe2016single, Wang et al. wang2016single, and Xin et al. xin2016rna (A) Kernel density estimate (KDE) plot of alpha scTOP scores for alpha cells (solid) and beta cells (dashed), and a box-and-whisker plot of alpha scTOP scores for alpha cells. (B) KDE plot of beta scTOP scores for beta cells (solid) and delta cells (dashed), and a box-and-whisker plot of beta scTOP scores for beta cells.

## Preprocessing rationale

In order to mitigate batch effects, the preprocessing step in scTOP takes each cell and ranks each gene according to expression. These ranks are converted into percentiles, which are then transformed into z-scores assuming a normal distribution.

By ranking the genes before converting to z-scores, we are ignoring the absolute values of RNA counts and instead focusing on the relative values. Some sequencing platforms may measure many more counts than others; although we can't recover the unmeasured counts that are lost via dropouts, we can remove the effect of differences in counts by ranking. We assume that each cell contains similar numbers of mRNA and that the actual number of RNA doesn't matter as much as the relative expression of different genes. For example, the highest-expressed gene in one cell should be comparable to the highest-expressed gene in another cell, regardless of RNA count. Ignoring the absolute values of RNA counts reduces the differences caused by different scRNA-seq technologies and experiments, as shown by the "Batch effects" section.

The second preprocessing step is to convert the ranks to z-scores, assuming a normal distribution. This step results in a mean of zero and standard deviation of one. In data analysis, it is beneficial to standardize the data before comparing across datasets because this prevents a disproportionate bias towards features with large values. In the case of scTOP, having a mean of zero and a standard deviation of one is especially important because the underlying math relies on the dot product of two uncorrelated vectors to be zero and the magnitude of a vector to be one.

By ranking and z-scoring, we remove undue weighting of genes according to magnitude of expression, instead prioritizing the relative expression.

## Comment 4

About lineages, this is perhaps the most important application of scTOP as it brings out something beyond cell types that was the input to the system. The authors have some discussion of how having fewer cell types make it harder to map out the space and hence the lineages. But many applications where one is interested in cell fate dynamics of only a handful of cell types, sometimes one cell type going to two, is central to understand the underlying genetic logic of that drives the cascade of "bifurcations". This feels like a big limitation, and I am curious if authors to say a little more on this, perhaps again by taking a concrete example, either with synthetic or real data.

## Response:

One limitation of scTOP is that a certain number of cells are needed per cell type in order to create an accurate expression profile for that cell type. While having more cell types can indeed help map out the cell type subspace, most cell types can be removed from the reference basis and scTOP scores are still able to distinguish the remaining types (see Supplementary Information section "Robustness of scTOP", which shows the result of having few cell types in the reference basis). scTOP is able to visualize the cell fate dynamics of one cell type going to two. A concrete example can be found in the hematopoiesis lineage tracing data. In this dataset, clonal families with three time points reveal the dynamics of hematopoietic stem cells differentiating into mature blood cells. Figure 6 shows the scTOP scores of individual clonal families (i.e. sister cells that originated from the same stem cell) over time. One of these plots shows the case of one cell type going to two: progenitor cells going to neutrophil and monocytes. The plot with basophils, neutrophils, and eosinophils shows one cell type going to three other cell types. Another example of one cell type going to two is shown by the AT1/AT2 plots, where a lung alveolar progenitor cell differentiates into either AT1 or AT2.

The biggest limitation of scTOP is the case where the cell type of a sample of interest is not included in the reference basis. In this case, all the corresponding scTOP scores will be low, unless the cell type of the sample is highly correlated with a cell type in the basis. For this reason, the scTOP scores may be sensitive to change when highly-correlated cell types are added or removed.

## Comment 5

Also, on lineages, could some analysis be provided to see if expected gene expression changes happen along the directions of cell fate changes? This would provide some confidence on the predicted cell fate dynamics.

## Response:

Figure 5 of the main text shows the development of mouse alveolar cells. The scTOP scores for AT1 and AT2 are shown for each time point of this time series data, and each cell is colored by the expression of AT1 or AT2 marker genes. These marker genes are the genes that are expected to change and become highly expressed when AT1 or AT2 fates are adopted. As shown by the plots, expression of these marker genes occurs along the directions of cell fate indicated by scTOP. The expected gene expression changes do occur with the dynamics visualized by scTOP.

## Comment 6

You should explicitly mention " $\xi$ " is the basis in methods section II A. I don't think its explicitly mentioned anywhere and would be useful for readers not familiar with these types of methods.

## Response:

To address this comment, we have added the following line:

We refer to as the reference basis.

## Comment 7

Figure 2 a,b,c are referred to in the text but the figure does not contain these labels.

## Response:

To address this comment, we have edited the figure and added labels.

## Comment 8

What is the interpretation of a negative scTOP score? Some of the plots contain small negative values. For example, in Figure 2 when plotting Ciliated vs AT2, cells high along the Ciliated axis

become increasingly negative along the AT2 axis. Are these cells more or less like AT2 cells than the zero point? A similar result is seen in Figure 7 where high AT1 axis cells become increasing negative along the AT2 axis. Some other moderately high negative values are also seen in Figure 4 and 6.

**Response:**

To address the interpretation of negative scores, we have added the following section to the Supplementary Information:

### **Interpreting scTOP scores**

In theory, the attractor-network order parameters we have adapted for gene expression data range between negative one and positive one. An attractor state order parameter with a value of positive one means the system is perfectly aligned with that particular attractor state, and negative one means it is the exact opposite of that attractor state. Zero means that it is neither correlated nor anti-correlated with that attractor state.

In practice, scTOP scores generally do not reach positive one. scRNA-seq data contains significant numbers of dropouts, and these zeroes decrease the magnitude of the scTOP score. When an aggregate score is taken, the effect of dropouts is decreased and the scTOP score increases. This is important to keep in mind when interpreting scTOP scores; any score above 0.1 is notable, and since the data is so noisy even the best-case score may be well below 1. It's helpful to have a control population to compare with, to have a measure of the range of best-case scTOP scores. This is also why it's best to compare distributions of scores rather than scores for individual cells, since noise plays a non-negligible role. scTOP scores are rarely negative. Negative values for scTOP scores correspond to cases

where the sample gene expression profile is the opposite of the reference profile. For example, a score of -1 would indicate that all the genes which are highly-expressed in the reference are lowly-expressed in the sample, and vice versa. There are cases where the scores are low, negative values, indicating that the sample does not align well with the reference and that some genes which are highly- (lowly-) expressed in the reference are lowly- (highly-) expressed in the sample. From the data, it appears that it's unlikely for gene networks to contain cell types which are opposites of one another. One possible reason is that some genes, like housekeeping genes, are similarly expressed across all cell types. Also, it's possible that cells which expressed the exact opposite genes of any given cell type would not be able to survive.

**Comment 9**

Are there any dataset-specific preprocessing steps done? For example filtering cells or genes based on quality control metrics. If so, they should be reported so that the results are reproducible.

**Response:**

We took the datasets as they were deposited and did not filter any genes. As described in the Supplementary Information section "Reference basis construction," we discarded cells if there were fewer than 100 cells of the corresponding cell type. This is because the reference basis needs at least 100 cells per cell type in order to represent accurate expression profiles for the given cell types.

**Comment 10**

The code in the linked Github repository contains a tutorial, but the code used to run scTOP on the other datasets should also be provided.

**Response:**

We have made the following changes to address this comment:

We have implemented scTOP in an easy-to-use Python package, available on the Python Package Index and Github. The code for the analyses in this paper is available in a separate Github repository.

Second decision letter

MS ID#: DEVELOP/2023/201873

MS TITLE: scTOP: physics-inspired order parameters for cellular identification and visualization

AUTHORS: Maria Yampolskaya, Michael Herriges, Laertis Ikonou, Darrell Kotton, and Pankaj Mehta

I have now received all the referees reports on the above manuscript, and have reached a decision. The referees' comments are appended below, or you can access them online: please go to BenchPress and click on the 'Manuscripts with Decisions' queue in the Author Area.

The overall evaluation is very positive and we would like to publish a revised manuscript in Development, provided that the referee's 2 last comments are addressed. Please attend to this reviewers' comment in your revised manuscript and detail it in a short response. If you do not agree with this suggestion explain clearly why. If it would be helpful, you are welcome to contact us to discuss your revision in greater detail.

Reviewer 1*Advance summary and potential significance to field*

The authors have addressed all my comments, and I am very happy with the current manuscript.

*Comments for the author*

I only have a small cosmetic comment : there were clear Latex compilation mistakes, all references to Supplement are replaced by ??. Please make sure this is fixed upon final submission.

Reviewer 2*Advance summary and potential significance to field*

With scTOP authors provide an interesting addition to the current slew of tools to utilize single cell data. They offer a way to build basis vectors from established cell atlases. The methodology utilizes a framework developed in physics to study magnetism and then extensively used in neuroscience. Beyond providing a tool to perform the various analysis this work potentially allows more physicists to engage with this rapidly developing field of cellular identity and dynamics.

*Comments for the author*

The authors have answered most of my issues to my satisfaction. There is only one comment I would like authors to include more on in the SI. This is on the issue of normalization. Authors made a good case for their scheme that removes the actual counts and only use the rank. It would be great to see that if they kept the counts to calculate z-scores the results are less "robust". This will allow users to fully understand when and when to ignore the read counts which are widely used to perform many analyses in the field.

**Second revision**Author response to reviewers' comments

## Comment 1

I only have a small cosmetic comment : there were clear Latex compilation mistakes, all references to Supplement are replaced by ??. Please make sure this is fixed upon final submission.

## Response:

Thank you for catching this mistake, we have fixed it.

The authors have answered most of my issues to my satisfaction. There is only one comment I would like authors to include more on in the SI. This is on the issue of normalization. Authors made a good case for their scheme that removes the actual counts and only use the rank. It would be great to see that if they kept the counts to calculate z-scores the results are less "robust". This will allow users to fully understand when and when to ignore the read counts which are widely used to perform many analyses in the field.

Response:

Thank you for your comment. We have added the following section to the SI:

As part of preprocessing, scTOP ranks the genes for each cell and then converts the ranks to z-scores assuming a normal distribution. The ranking step is important because the relative expression of genes in a given cell is more reliable than the absolute expression, since some sequencing methods may result in more counts than others. In the field of scRNA-seq analysis, it is more common to preprocess RNA counts without ranking them. To validate the ranking step, we recreated figure S2 without ranking the genes. The preprocessing for figure S3 involved calculating the z-scores for each cell after taking the logarithm of the counts plus one. As shown in the figure, there is significantly more overlap of score distributions for cells of different types. This method of preprocessing makes the algorithm worse at distinguishing between cell types. Also, there is less overlap between the score distributions of cells of the same type across data sets. This suggests that ranking is important for mitigating batch effects.

The new figure (S3) is included below.

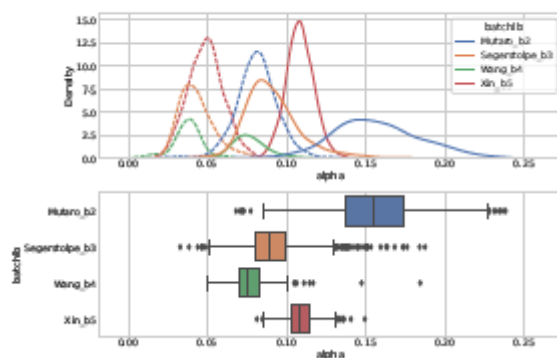

Figure 1: Pancreatic data from different experiments using different scRNA-seq technologies. This figure is the same as figure S2(a) except the ranking step of preprocessing has been removed. scTOP performs worse when processed RNA counts are used instead of gene rankings. The top shows a kernel density estimate (KDE) plot of alpha scTOP scores for alpha cells (solid) and beta cells (dashed), and a box-and-whisker plot of alpha scTOP scores for alpha cells.

### Third decision letter

MS ID#: DEVELOP/2023/201873

MS TITLE: scTOP: physics-inspired order parameters for cellular identification and visualization

AUTHORS: Maria Yampolskaya, Michael Herriges, Laertis Ikonou, Darrell Kotton, and Pankaj Mehta

ARTICLE TYPE: Research Article

I am happy to tell you that your manuscript has been accepted for publication in Development, pending our standard ethics checks.
